# Supplementary material for: Early lung cancer diagnostic biomarker discovery by machine learning methods
Source: PubMed Central journal article supplement — Transl Oncol. 2020 Nov 17;14(1):100907. doi: 10.1016/j.tranon.2020.100907 (PMC7683339; doi:10.1016/j.tranon.2020.100907), 2020-11-17

## **SUPPLEMENTARY INFORMATION – Content list**

### **TABLES AND FIGURES**

- Table S1- 46 influential metabolomic biomarkers with statistical significance of Stage 1 lung tumor patients (mean value with SD).
- Table S2 - PCA of 10 metabolomic biomarkers in early lung tumor detection.
- Table S3 - The logistic regression models of different combined variates.
- Table S4 - 50 influential metabolomic biomarkers with statistical significance of lung tumor patients (mean value with SD).
- Table S5 - Non-parametric test of the alteration of metabolomic biomarkers in stage progression.
- Table S6 - The AUC values of ROC curve of metabolomic biomarkers in each tumor stage.
- Table S7 - Rank metabolomic biomarker features by FCBF.
- Table S8 - AUC value of machine learning models changing with the number of variates.
- Figure S1 - ROC analysis of 10 metabolomic biomarkers in early lung tumor detection.
- Figure S2 - 50 influential metabolomic biomarkers with statistical significance of lung tumor patients (mean value with SD).
- Figure S3 - ROC analysis of metabolomic biomarkers with statistical significance of adenocarcinoma and squamous carcinoma patients.
- Figure S4 - AUC value of machine learning models changing with the number of variates.

**Table S1.46 influential metabolomic biomarkers with statistical significance of Stage 1 lung tumor patients(mean value with SD).**

|                        | Stage 1 lung cancer patients |          | Healthy individuals |          |                            | Stage 1 lung cancer patients |          | Healthy individuals |          |
|------------------------|------------------------------|----------|---------------------|----------|----------------------------|------------------------------|----------|---------------------|----------|
|                        | Mean                         | SD       | Mean                | SD       |                            | Mean                         | SD       | Mean                | SD       |
| GSH                    | 0.0552                       | 0.08758  | 0.0239              | 0.02189  | Trigonelline               | 0.0624                       | 0.0313   | 0.0927              | 0.0323   |
| L-Leucine              | 207.8333                     | 59.89795 | 173.2221            | 30.99564 | LPC(16:0)                  | 95.7481                      | 37.55637 | 66.0326             | 22.60928 |
| L-Kynurenine           | 1.4764                       | 0.62948  | 0.9473              | 0.33082  | LPC(18:0)                  | 102.2146                     | 47.90141 | 69.1203             | 37.94514 |
| Phenylalanine          | 162.5185                     | 47.96366 | 113.8605            | 21.37058 | L-Glutamic acid            | 0.3021                       | 0.18109  | 0.1995              | 0.04863  |
| Creatine               | 0.8021                       | 0.22692  | 0.6707              | 0.17243  | PC(36:5)                   | 7.0837                       | 10.52985 | 5.7728              | 2.34784  |
| L-Valine               | 207.5741                     | 89.99405 | 126.9628            | 24.34529 | PC(36:3)                   | 6.1196                       | 6.37649  | 7.3216              | 2.03146  |
| Proline                | 42.2833                      | 27.18405 | 15.9                | 5.4435   | PC(36:4)                   | 4.9199                       | 4.53674  | 8.2205              | 2.01927  |
| Spermidine             | 8.7902                       | 2.86546  | 5.6814              | 1.15928  | PE(36:4)                   | 10.2983                      | 11.63711 | 14.0449             | 3.40511  |
| Ascorbic acid          | 1.4679                       | 0.43496  | 1.1425              | 0.27492  | Glycochenodeoxycholic acid | 7.0499                       | 5.73509  | 3.4542              | 2.11454  |
| 2-DG                   | 0.0335                       | 0.01979  | 0.0702              | 0.02361  | Hexanoylcarnitine          | 10.4643                      | 6.03788  | 5.3372              | 2.48598  |
| Cl-Tyr                 | 0.2859                       | 0.15553  | 0.4451              | 0.19478  | Citric acid                | 23.847                       | 10.98938 | 45.7279             | 17.16728 |
| o-Tyr                  | 31.313                       | 9.14382  | 22.6116             | 5.51842  | Hydroxybutanedioic acid    | 1.709                        | 0.94889  | 2.0154              | 0.62638  |
| Choline                | 0.4156                       | 0.21653  | 0.2517              | 0.06625  | Succinic acid              | 3.165                        | 1.22967  | 4.4542              | 1.11105  |
| Serine                 | 0.4407                       | 0.21219  | 0.2926              | 0.07357  | Oxaloacetic acid           | 0.2947                       | 0.27572  | 0.3724              | 0.27388  |
| Aminohippuric acid     | 6.632                        | 4.39631  | 3.1251              | 0.74607  | (E)-butenedioic acid       | 59.3204                      | 15.38841 | 77.6209             | 17.93606 |
| Palmitoyl-L-carnitine  | 5.4593                       | 2.83079  | 1.8756              | 0.8058   | Uric acid                  | 36.9574                      | 9.74601  | 32.7465             | 9.05944  |
| 4,6-dihydroxyquinoline | 1.9922                       | 0.42138  | 1.7496              | 0.24816  | indole-3-lactic acid       | 2.615                        | 0.97203  | 1.9298              | 0.58694  |
| Carnitine              | 6.658                        | 3.27084  | 3.5702              | 0.75905  | Glucose                    | 17.2241                      | 12.17761 | 17.8014             | 4.66604  |
| C16:1LPC               | 3.5159                       | 2.32108  | 1.084               | 0.9121   | lactate                    | 200.1296                     | 78.1042  | 216.7907            | 51.65387 |
| C18:1LPC               | 43.6193                      | 26.4116  | 25.613              | 15.96863 | Xanthine                   | 0.3308                       | 0.17033  | 0.5212              | 0.14841  |
| Xanthosine             | 0.0853                       | 0.07944  | 0.0514              | 0.0237   | Fumaric acid               | 26.7704                      | 5.16558  | 37.1465             | 10.1389  |
| Taurine                | 104.6593                     | 36.71764 | 55.9512             | 10.89002 | Ethylmalonic acid          | 0.419                        | 0.38368  | 0.5725              | 0.43121  |
| Inosine                | 1.1724                       | 0.87956  | 1.5929              | 0.95401  | PLA                        | 22.6422                      | 23.33959 | 39.6047             | 24.10801 |

Abbreviations: SD, standard deviation.

**Table S2. PCA of 10 metabolomic biomarkers in early lung tumor detection.**

| Component | Initial Eigenvalues |               |              | Extraction Sums of Squared Loadings |               |              |
|-----------|---------------------|---------------|--------------|-------------------------------------|---------------|--------------|
|           | Total               | % of Variance | Cumulative % | Total                               | % of Variance | Cumulative % |
| 1         | 6.224               | 62.236        | 62.236       | 6.224                               | 62.236        | 62.236       |
| 2         | 1.294               | 12.945        | 75.181       | 1.294                               | 12.945        | 75.181       |
| 3         | .807                | 8.072         | 83.253       |                                     |               |              |
| 4         | .618                | 6.176         | 89.429       |                                     |               |              |
| 5         | .375                | 3.745         | 93.175       |                                     |               |              |
| 6         | .273                | 2.731         | 95.905       |                                     |               |              |
| 7         | .190                | 1.902         | 97.807       |                                     |               |              |
| 8         | .112                | 1.121         | 98.928       |                                     |               |              |
| 9         | .084                | .840          | 99.768       |                                     |               |              |
| 10        | .023                | .232          | 100.000      |                                     |               |              |

Abbreviations: PCA, principal component analysis.

**Table S3. The logistic regression models of different combined variates.**

---

| Logistic regression model |                                                                                                                                                                                                                                   |
|---------------------------|-----------------------------------------------------------------------------------------------------------------------------------------------------------------------------------------------------------------------------------|
| Combination<br>of two     | $\text{Log}(P/(1-P)) = (-10.105) + (0.948) \text{ Spermidine} + (0.980) \text{ Amino-hippuric acid}$                                                                                                                              |
| Combination<br>of three   | $\text{Log}(P/(1-P)) = (-11.443) + (0.123) \text{ Proline} + (0.756) \text{ Palmitoyl-L-carnitine} + (0.094) \text{ Taurine.}$                                                                                                    |
| Combination<br>of six     | $\text{Log}(P/(1-P)) = (-13.455) + (3.897) \text{ L-Kynurenine} + (0.322) \text{ Proline} + (-6.503) \text{ Spermidine} + (-2.309) \text{ Amino-hippuric acid} + (1.186) \text{ Palmitoyl-L-carnitine} + (0.745) \text{ Taurine}$ |
| Combination<br>of four    | $\text{Log}(P/(1-P)) = (0.78) + (-1.633) \text{ L-Kynurenine} + (0.055) \text{ Proline} + (-0.268) \text{ Carnitine} + (13.086) \text{ Hypoxanthine.}$                                                                            |

---

**Table S4. 50 influential metabolomic biomarkers with statistical significance of lung tumor patients (mean value with SD).**

|                        | Lung tumor patients |          | Healthy individuals |          |                            | Lung tumor patients |          | Healthy individuals |          |
|------------------------|---------------------|----------|---------------------|----------|----------------------------|---------------------|----------|---------------------|----------|
|                        | Mean                | SD       | Mean                | SD       |                            | Mean                | SD       | Mean                | SD       |
| GSH                    | 0.0588              | 0.07833  | 0.0239              | 0.02189  | LPC(16:0)                  | 91.505              | 34.29612 | 66.0326             | 22.60928 |
| L-Leucine              | 204.5373            | 61.23687 | 173.2221            | 30.99564 | LPC(18:0)                  | 95.1173             | 43.91685 | 69.1203             | 37.94514 |
| L-Kynurenine           | 3.0125              | 16.5038  | 0.9473              | 0.33082  | LPC(20:1)                  | 2.8345              | 3.60471  | 2.2443              | 2.34914  |
| Phenylalanine          | 158.7413            | 47.57185 | 113.8605            | 21.37058 | L-Glutamic acid            | 0.3041              | 0.21202  | 0.1995              | 0.04863  |
| Creatine               | 1.9993              | 13.254   | 0.6707              | 0.17243  | PC(36:5)                   | 7.0407              | 9.79651  | 5.7728              | 2.34784  |
| L-Valine               | 203.2783            | 89.12877 | 126.9628            | 24.34529 | PC(36:3)                   | 6.77                | 7.03821  | 7.3216              | 2.03146  |
| Proline                | 44.1586             | 29.45611 | 15.9                | 5.4435   | PC(36:4)                   | 5.0732              | 4.33515  | 8.2205              | 2.01927  |
| Spermidine             | 8.6106              | 2.99739  | 5.6814              | 1.15928  | PE(36:4)                   | 11.7863             | 12.51869 | 14.0449             | 3.40511  |
| Ascorbic acid          | 1.521               | 0.63584  | 1.1425              | 0.27492  | Glycochenodeoxycholic acid | 6.4763              | 5.49013  | 3.4542              | 2.11454  |
| 2-DG                   | 0.0453              | 0.10691  | 0.0702              | 0.02361  | Hexanoylcarnitine          | 9.7603              | 6.30752  | 5.3372              | 2.48598  |
| Cl-Tyr                 | 0.3141              | 0.17033  | 0.4451              | 0.19478  | Citric acid                | 22.2327             | 10.01918 | 45.7279             | 17.16728 |
| o-Tyr                  | 31.9025             | 9.49705  | 22.6116             | 5.51842  | Hydroxybutanedioic acid    | 1.7823              | 1.66618  | 2.0154              | 0.62638  |
| Choline                | 0.7088              | 2.99064  | 0.2517              | 0.06625  | Succinic acid              | 3.0168              | 1.06839  | 4.4542              | 1.11105  |
| Serine                 | 0.5142              | 0.9124   | 0.2926              | 0.07357  | Oxaloacetic acid           | 0.3337              | 0.46982  | 0.3724              | 0.27388  |
| Aminohippuric acid     | 7.0862              | 4.61527  | 3.1251              | 0.74607  | (E)-butenedioic acid       | 57.3241             | 13.80873 | 77.6209             | 17.93606 |
| Palmitoyl-L-carnitine  | 5.1665              | 2.58248  | 1.8756              | 0.8058   | Uric acid                  | 36.218              | 8.86447  | 32.7465             | 9.05944  |
| 4,6-dihydroxyquinoline | 1.9545              | 0.44431  | 1.7496              | 0.24816  | Uridine                    | 10.7273             | 6.61985  | 7.3944              | 3.58673  |
| Carnitine              | 6.4605              | 3.00478  | 3.5702              | 0.75905  | indole-3-lactic acid       | 2.6793              | 1.14241  | 1.9298              | 0.58694  |
| C16:1LPC               | 3.3382              | 2.2814   | 1.804               | 0.9121   | Glucose                    | 17.2445             | 11.68526 | 17.8014             | 4.66604  |
| C18:1LPC               | 40.6131             | 23.57834 | 25.613              | 15.96863 | lactate                    | 196.7984            | 77.855   | 216.7907            | 51.65387 |
| Xanthosine             | 0.3808              | 3.15846  | 0.0514              | 0.0237   | Xanthine                   | 1.882               | 16.69688 | 0.5212              | 0.14841  |
| Taurine                | 100.8773            | 39.28674 | 55.9512             | 10.89002 | Fumaric acid               | 26.1215             | 5.44013  | 37.1465             | 10.1389  |
| Inosine                | 1.4477              | 2.49899  | 1.5929              | 0.95401  | 3-hydroxybutyric           | 9.8314              | 10.12331 | 10.4116             | 5.65005  |
| Trigonelline           | 0.0666              | 0.04026  | 0.0927              | 0.0323   | Ethylmalonic acid          | 0.4359              | 0.42776  | 0.5725              | 0.43121  |
| LPE(16:0)              | 1.0771              | 0.68268  | 1.2147              | 0.51679  | PLA                        | 23.3821             | 25.05129 | 39.6047             | 24.10801 |

Abbreviations: SD, standard deviation.

**Table S5.Non-parametric test of the alteration of metabolomic biomarkers in stage progression.**

|               |                        | Test statistic | Std. Error | Std. Test Statistic | Sig.  | p-Value of Kruskal-Wallis |                      | Test statistic         | Std. Error | Std. Test Statistic | Sig.   | p-Value of Kruskal-Wallis |       |
|---------------|------------------------|----------------|------------|---------------------|-------|---------------------------|----------------------|------------------------|------------|---------------------|--------|---------------------------|-------|
| L-Kynurenine  | Healthy people-Stage 1 | 50.808         | 9.174      | 5.538               | 0.000 | 0.000                     | o-Tyr                | Healthy people-Stage 1 | 49.154     | 9.174               | 5.358  | 0.000                     | 0.000 |
|               | Healthy people-Stage 2 | 46.665         | 10.678     | 4.370               | 0.000 | 0.000                     |                      | Healthy people-Stage 2 | 62.799     | 10.678              | 5.881  | 0.000                     | 0.000 |
|               | Healthy people-Stage 3 | 54.785         | 11.289     | 4.853               | 0.000 | 0.000                     |                      | Healthy people-Stage 3 | 51.349     | 11.289              | 4.548  | 0.000                     | 0.000 |
|               | Healthy people-Stage 4 | 72.132         | 26.804     | 2.691               | 0.007 | 0.071                     |                      | Healthy people-Stage 4 | 14.849     | 26.804              | 0.554  | 0.580                     | 1.000 |
|               | Stage 2-Stage 1        | 4.143          | 10.221     | 0.405               | 0.685 | 1.000                     |                      | Stage 2-Stage 1        | -13.644    | 10.221              | -1.335 | 0.182                     | 1.000 |
|               | Stage 2-Stage3         | -8.120         | 12.155     | -0.668              | 0.504 | 1.000                     |                      | Stage 2-Stage3         | 11.450     | 12.155              | 0.942  | 0.346                     | 1.000 |
|               | Stage 2-Stage 4        | -25.467        | 27.180     | -0.937              | 0.349 | 1.000                     |                      | Stage 2-Stage 4        | 47.950     | 27.180              | 1.764  | 0.078                     | 0.777 |
|               | Stage 1-Stage 3        | -3.977         | 10.858     | -0.366              | 0.714 | 1.000                     |                      | Stage 1-Stage 3        | -2.194     | 10.858              | -0.200 | 0.840                     | 1.000 |
|               | Stage 1-Stage 4        | -21.324        | 26.625     | -0.801              | 0.423 | 1.000                     |                      | Stage 1-Stage 4        | 34.306     | 26.626              | 1.288  | 0.198                     | 1.000 |
|               | Stage 3-Stage 4        | -17.347        | 27.426     | -0.632              | 0.527 | 1.000                     |                      | Stage 3-Stage 4        | 36.500     | 27.426              | 1.331  | 0.183                     | 1.000 |
| Phenylalanine | Healthy people-Stage 1 | 54.327         | 9.174      | 5.922               | 0.000 | 0.000                     | Amino-hippuric acid  | Healthy people-Stage 1 | 47.702     | 9.175               | 5.199  | 0.000                     | 0.000 |
|               | Healthy people-Stage 2 | 50.891         | 10.678     | 4.766               | 0.000 | 0.000                     |                      | Healthy people-Stage 2 | 63.135     | 10.678              | 5.913  | 0.000                     | 0.000 |
|               | Healthy people-Stage 3 | 52.958         | 11.289     | 4.691               | 0.000 | 0.000                     |                      | Healthy people-Stage 3 | 53.275     | 11.290              | 4.719  | 0.000                     | 0.000 |
|               | Healthy people-Stage 4 | 12.391         | 26.803     | 0.462               | 0.644 | 1.000                     |                      | Healthy people-Stage 4 | 31.202     | 26.805              | 1.164  | 0.244                     | 1.000 |
|               | Stage 2-Stage 1        | 3.435          | 10.221     | 0.336               | 0.737 | 1.000                     |                      | Stage 2-Stage 1        | -15.433    | 10.221              | -1.510 | 0.131                     | 1.000 |
|               | Stage 2-Stage3         | -2.067         | 12.155     | -0.170              | 0.865 | 1.000                     |                      | Stage 2-Stage3         | 9.860      | 12.156              | 0.811  | 0.417                     | 1.000 |
|               | Stage 2-Stage 4        | 38.500         | 27.179     | 1.417               | 0.157 | 1.000                     |                      | Stage 2-Stage 4        | 31.933     | 27.181              | 1.175  | 0.240                     | 1.000 |
|               | Stage 1-Stage 3        | 1.369          | 10.858     | 0.126               | 0.900 | 1.000                     |                      | Stage 1-Stage 3        | -5.573     | 10.859              | -0.513 | 0.608                     | 1.000 |
|               | Stage 1-Stage 4        | 41.935         | 26.625     | 1.575               | 0.115 | 1.000                     |                      | Stage 1-Stage 4        | 16.500     | 26.626              | 0.620  | 0.535                     | 1.000 |
|               | Stage 3-Stage 4        | 40.567         | 27.425     | 1.479               | 0.139 | 1.000                     |                      | Stage 3-Stage 4        | 22.073     | 27.427              | 0.805  | 0.421                     | 1.000 |
| L-Valine      | Healthy people-Stage 1 | 57.012         | 9.174      | 6.214               | 0.000 | 0.000                     | Palmitoy-L-carnitine | Healthy people-Stage 1 | 68.038     | 9.175               | 7.416  | 0.000                     | 0.000 |
|               | Healthy people-Stage 2 | 61.338         | 10.678     | 5.745               | 0.000 | 0.000                     |                      | Healthy people-Stage 2 | 66.290     | 10.678              | 6.208  | 0.000                     | 0.000 |
|               | Healthy people-Stage 3 | 51.545         | 11.289     | 4.566               | 0.000 | 0.000                     |                      | Healthy people-Stage 3 | 56.980     | 5.047               | 5.047  | 0.000                     | 0.000 |
|               | Healthy people-Stage 4 | 28.771         | 26.804     | 1.073               | 0.283 | 1.000                     |                      | Healthy people-Stage 4 | 73.140     | 2.729               | 2.729  | 0.006                     | 0.064 |
|               | Stage 2-Stage 1        | -4.326         | 10.221     | -0.423              | 0.672 | 1.000                     |                      | Stage 2-Stage 1        | 1.748      | 10.221              | 0.171  | 0.864                     | 1.000 |
|               | Stage 2-Stage3         | 9.793          | 12.155     | 0.806               | 0.420 | 1.000                     |                      | Stage 2-Stage3         | 9.310      | 12.156              | 0.766  | 0.444                     | 1.000 |
|               | Stage 2-Stage 4        | 32.567         | 27.180     | 1.198               | 0.231 | 1.000                     |                      | Stage 2-Stage 4        | -6.850     | 27.181              | -0.252 | 0.801                     | 1.000 |
|               | Stage 1-Stage 3        | 5.467          | 10.858     | 0.504               | 0.615 | 1.000                     |                      | Stage 1-Stage 3        | 11.058     | 10.859              | 1.018  | 0.309                     | 1.000 |
|               | Stage 1-Stage 4        | 28.241         | 26.625     | 1.061               | 0.289 | 1.000                     |                      | Stage 1-Stage 4        | -5.102     | 26.626              | -0.192 | 0.848                     | 1.000 |
|               | Stage 3-Stage 4        | 22.773         | 27.426     | 0.830               | 0.406 | 1.000                     |                      | Stage 3-Stage 4        | -16.160    | 27.427              | -0.589 | 0.556                     | 1.000 |
| Proline       | Healthy people-Stage 1 | 65.201         | 9.175      | 7.107               | 0.000 | 0.000                     | Carnitine            | Healthy people-Stage 1 | 55.967     | 9.175               | 6.100  | 0.000                     | 0.000 |
|               | Healthy people-Stage 2 | 73.829         | 10.678     | 6.914               | 0.000 | 0.000                     |                      | Healthy people-Stage 2 | 60.714     | 10.678              | 5.686  | 0.000                     | 0.000 |
|               | Healthy people-Stage 3 | 56.495         | 26.805     | 3.428               | 0.000 | 0.000                     |                      | Healthy people-Stage 3 | 48.270     | 11.290              | 4.276  | 0.000                     | 0.000 |
|               | Healthy people-Stage 4 | 91.895         | 11.290     | 5.004               | 0.001 | 0.006                     |                      | Healthy people-Stage 4 | 46.264     | 26.805              | 1.726  | 0.084                     | 0.844 |
|               | Stage 2-Stage 1        | -8.628         | 10.221     | -0.844              | 0.399 | 1.000                     |                      | Stage 2-Stage 1        | -4.746     | 10.221              | -0.464 | 0.642                     | 1.000 |
|               | Stage 2-Stage3         | 17.333         | 12.156     | 1.426               | 0.154 | 1.000                     |                      | Stage 2-Stage3         | 12.443     | 12.156              | 1.024  | 0.306                     | 1.000 |
|               | Stage 2-Stage 4        | -18.067        | 27.181     | -0.665              | 0.506 | 1.000                     |                      | Stage 2-Stage 4        | 14.450     | 27.181              | 0.532  | 0.595                     | 1.000 |
|               | Stage 1-Stage 3        | 8.706          | 10.859     | 0.802               | 0.423 | 1.000                     |                      | Stage 1-Stage 3        | 7.697      | 10.859              | 0.709  | 0.478                     | 1.000 |
|               | Stage 1-Stage 4        | -26.694        | 26.626     | -1.003              | 0.316 | 1.000                     |                      | Stage 1-Stage 4        | 9.704      | 26.626              | 0.364  | 0.716                     | 1.000 |
|               | Stage 3-Stage 4        | -35.400        | 27.427     | -1.291              | 0.197 | 1.000                     |                      | Stage 3-Stage 4        | 2.007      | 27.427              | 0.073  | 0.942                     | 1.000 |
| Spermidine    | Healthy people-Stage 1 | 61.042         | 9.174      | 6.653               | 0.000 | 0.000                     | Taurine              | Healthy people-Stage 1 | 68.247     | 9.174               | 7.439  | 0.000                     | 0.000 |
|               | Healthy people-Stage 2 | 53.386         | 10.678     | 5.000               | 0.000 | 0.000                     |                      | Healthy people-Stage 2 | 58.586     | 10.678              | 5.487  | 0.000                     | 0.000 |
|               | Healthy people-Stage 3 | 54.750         | 11.290     | 4.850               | 0.000 | 0.000                     |                      | Healthy people-Stage 3 | 61.262     | 11.290              | 5.426  | 0.000                     | 0.000 |
|               | Healthy people-Stage 4 | 7.236          | 26.805     | 0.270               | 0.787 | 1.000                     |                      | Healthy people-Stage 4 | 15.802     | 26.805              | 0.590  | 0.555                     | 1.000 |
|               | Stage 2-Stage 1        | 7.656          | 10.221     | 0.749               | 0.454 | 1.000                     |                      | Stage 2-Stage 1        | 9.661      | 10.221              | 0.945  | 0.345                     | 1.000 |
|               | Stage 2-Stage3         | -1.363         | 12.156     | -0.112              | 0.911 | 1.000                     |                      | Stage 2-Stage3         | -2.677     | 12.156              | -0.220 | 0.826                     | 1.000 |
|               | Stage 2-Stage 4        | 46.150         | 27.181     | 1.698               | 0.090 | 0.895                     |                      | Stage 2-Stage 4        | 42.783     | 27.181              | 1.574  | 0.115                     | 1.000 |
|               | Stage 1-Stage 3        | 6.292          | 10.859     | 0.579               | 0.562 | 1.000                     |                      | Stage 1-Stage 3        | 6.984      | 10.859              | 0.643  | 0.520                     | 1.000 |
|               | Stage 1-Stage 4        | 53.806         | 26.626     | 2.021               | 0.043 | 0.433                     |                      | Stage 1-Stage 4        | 52.444     | 26.626              | 1.970  | 0.049                     | 0.489 |
|               | Stage 3-Stage 4        | 47.513         | 27.427     | 1.732               | 0.083 | 0.832                     |                      | Stage 3-Stage 4        | 45.460     | 27.427              | 1.658  | 0.097                     | 0.974 |

**Table S6. The AUC values of ROC curve of metabolomic biomarkers in each tumor stage.**

|                       | Stage 1 | Stage 2 | Stage 3 |
|-----------------------|---------|---------|---------|
| L-Kynurenine          | 0.825   | 0.824   | 0.839   |
| Phenylalanine         | 0.848   | 0.832   | 0.852   |
| L-Valine              | 0.876   | 0.885   | 0.833   |
| Proline               | 0.923   | 0.952   | 0.902   |
| Spermidine            | 0.89    | 0.833   | 0.879   |
| o-Tyr                 | 0.822   | 0.883   | 0.852   |
| Amino-hippuric acid   | 0.811   | 0.903   | 0.848   |
| Palmitoyl-L-carnitine | 0.906   | 0.935   | 0.931   |
| Carnitine             | 0.848   | 0.888   | 0.861   |
| Taurine               | 0.92    | 0.881   | 0.937   |

Abbreviations: ROC, receiver operating characteristic; AUC, area under the curve.

**Table S7. Rank metabolomic biomarker features by FCBF.**

|                       | Score |
|-----------------------|-------|
| Taurine               | 0.655 |
| Palmitoyl-L-carnitine | 0.482 |
| proline               | 0.470 |
| 2-DG                  | 0.446 |
| PE(36:4)              | 0.353 |
| Xanthine              | 0.303 |
| PC(36:5)              | 0.290 |
| Citric acid           | 0.280 |

Abbreviations: FCBF, fast correlation-based filter.



**Table S8. AUC value of machine learning models changing with the number of variates.**

|                | 1     | 2     | 3     | 4     | 5     | 6     | 7     | 8     |
|----------------|-------|-------|-------|-------|-------|-------|-------|-------|
| KNN            | 0.947 | 0.959 | 0.964 | 0.971 | 1.000 | 0.988 | 0.988 | 1.000 |
| SVM            | 0.925 | 0.927 | 0.961 | 0.995 | 1.000 | 1.000 | 1.000 | 1.000 |
| Random Forest  | 0.945 | 0.952 | 0.960 | 0.968 | 0.996 | 1.000 | 0.998 | 0.997 |
| Neural Network | 0.895 | 0.917 | 0.944 | 0.944 | 0.999 | 0.991 | 0.991 | 0.998 |
| Naïve Bayes    | 0.869 | 0.926 | 0.964 | 0.990 | 0.998 | 1.000 | 1.000 | 1.000 |
| AdaBoost       | 0.833 | 0.859 | 0.859 | 0.887 | 0.887 | 0.899 | 0.899 | 0.913 |

Abbreviations: AdaBoost, Adaptive Boosting; SVM, support vector machines; KNN, k-nearest neighbor; AUC, area under the curve.

**Figure S1.** ROC analysis of 10 metabolomic biomarkers in early lung tumor detection.

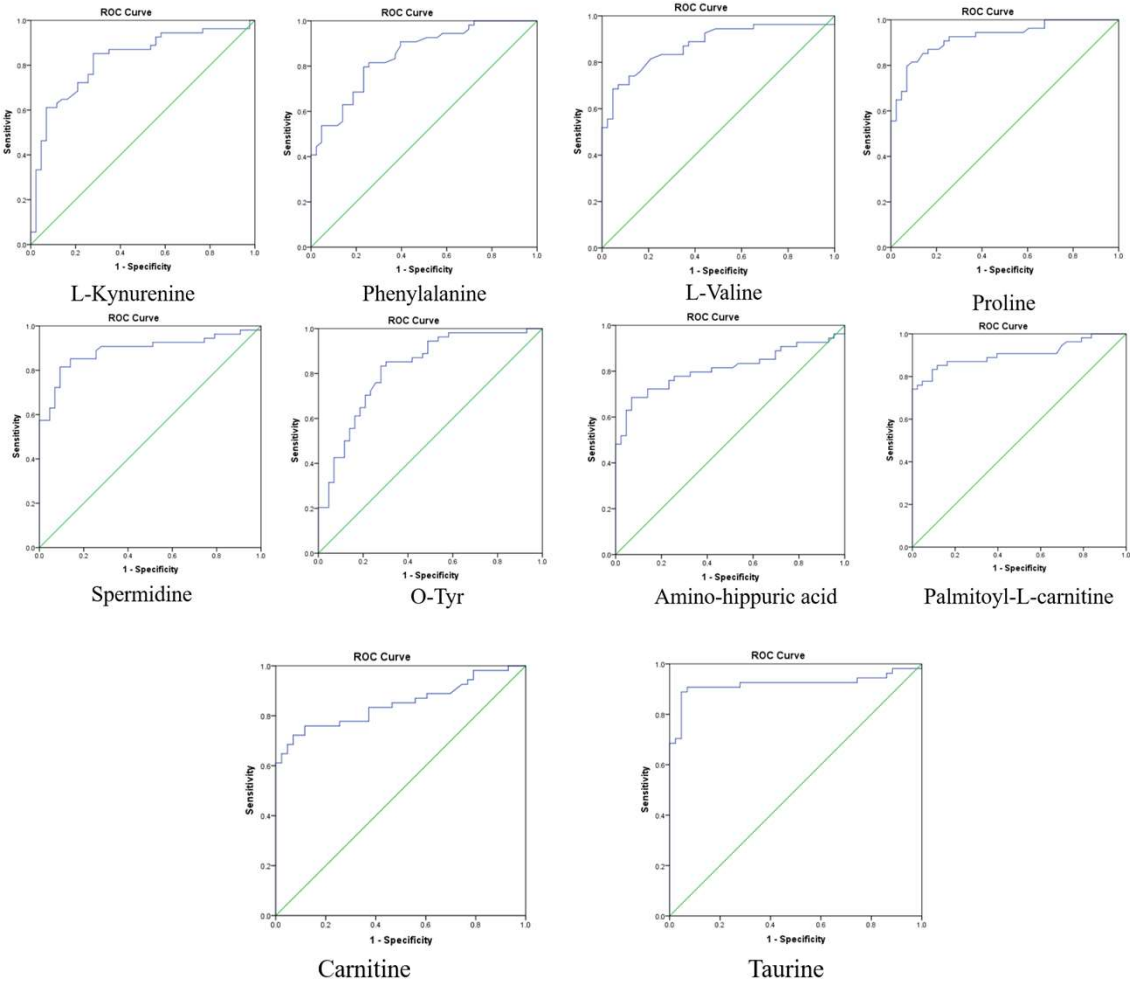

**Figure S2.** 50 influential metabolomic biomarkers with statistical significance of lung tumor patients (mean value with SD).

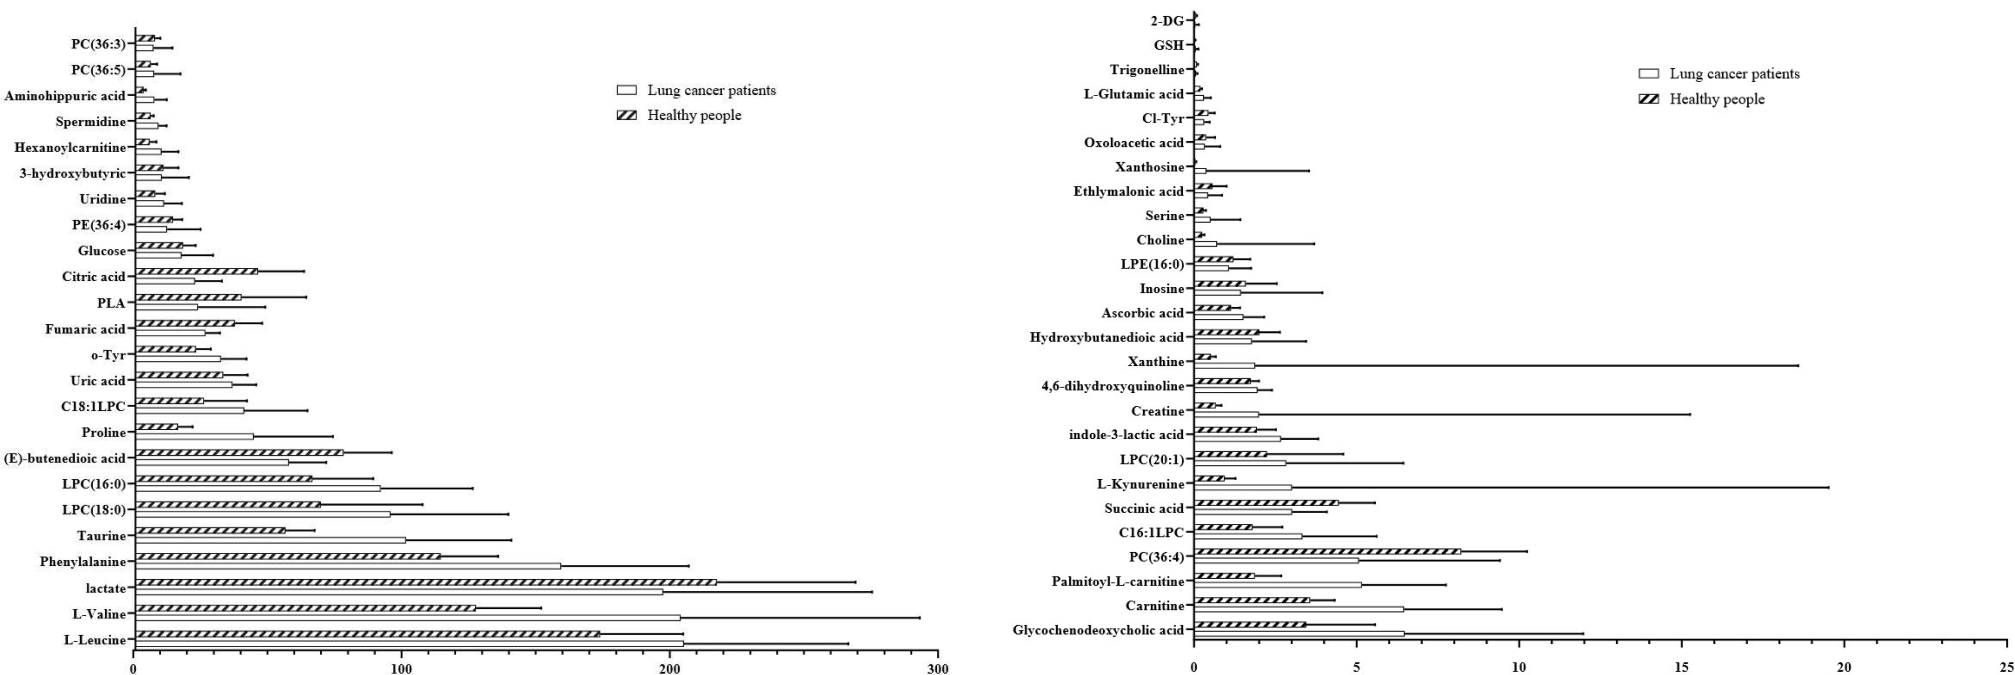

**Figure S3.** ROC analysis of metabolomic biomarkers with statistical significance of adenocarcinoma and squamous carcinoma patients.

Hippuric acid

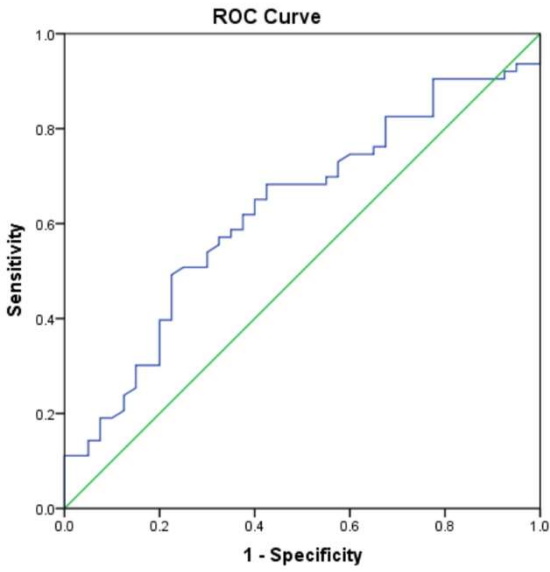

Hypoxanthine

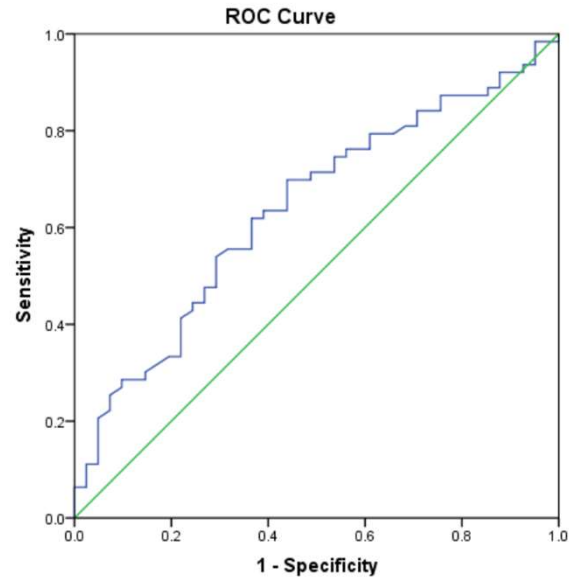

**Figure S4.** AUC value of machine learning models changing with the number of variates.

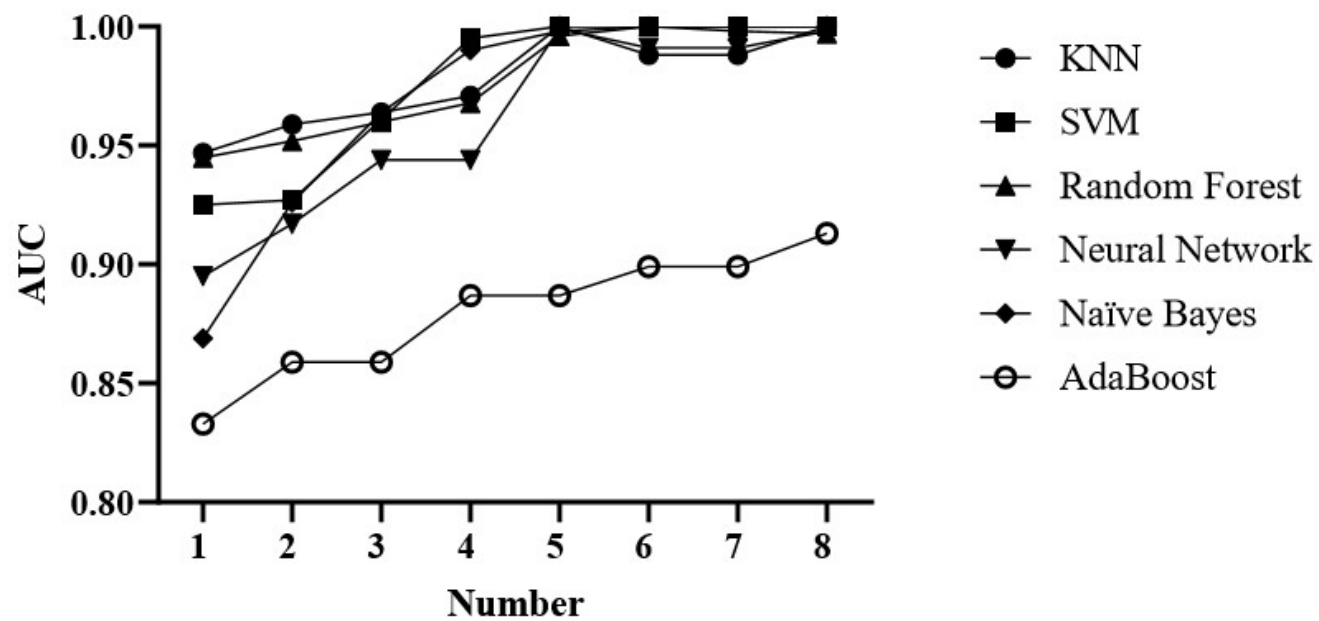

Supplement: mmc1.pdf [file mmc1.pdf]
